# Supplementary material for: Zebrafish B cell acute lymphoblastic leukemia: new findings in an old model
Source: PubMed Central journal article supplement (PMC7170496; doi:10.18632/oncotarget.27555), 2020-04-14
Supplement: oncotarget-11-1292-s001.pdf [file oncotarget-11-1292-s001.pdf]

## Zebrafish B cell acute lymphoblastic leukemia: new findings in an old model

### SUPPLEMENTARY MATERIALS

**Supplementary Table 1: Primer sequences for outer preamplification and inner qPCR reactions**

| 96 primers on IFC | Purpose    | Outer Forward Primer Sequence | Outer Reverse Primer Sequence | Inner Forward Primer Sequence | Inner Reverse Primer Sequence |
|-------------------|------------|-------------------------------|-------------------------------|-------------------------------|-------------------------------|
| blnk              | SC qRT PCR | CAACCCAGCAAACAACCCAG          | GACTCCTGTTCACCACCG            | CGAGGACGACTACATCGAGC          | GTCAGTGTCTCTCCGTGGG           |
| cd79b             | SC qRT PCR | TTGGCGTTAAGACAGGTCCG          | GTCGAACCAGAGGAACGACA          | TACTGTGTGCCGTCGAATCC          | GTGCCACTGTCTCAGTCTC           |
| foxo1b            | SC qRT PCR | GACCCGGATTTGAGCCTCT           | GTTGTCTGGCAGTGGAAGT           | AAACCCGAGCAAGGAATCGT          | GGCTTCTCGTCAGGGTAGTC          |
| id3               | SC qRT PCR | AAGTGTCTATGAAGCGGTGT          | AATCTCCACTTGGCTCACGG          | CTGCAAGAGTCCTCCGAGG           | TGGCTCACGGACTTGTCTG           |
| ighz              | SC qRT PCR | CCACCCGGGACACGCTTAAT          | TGGAGCCCTGTTGTGGATG           | CAGGAGACTGTGAGGAG             | TAGCAGGAGTGTGTGTGC            |
| igic1s1           | SC qRT PCR | GAGCAGCAGTGGATGGAGAG          | AGTGTGTGTGCTGAATGCAG          | CAGGAGACTGTGAGGAG             | TAGCAGGAGTGTGTGTGC            |
| igiv2a1           | SC qRT PCR | CACTGTGATGGTGCTTTGGC          | TCGCCCACTTCCAGCTTAG           | GATGAGTGCAGAAGGGTCA           | GCGTCCAGTCAGAAGGGAAT          |
| pax5              | SC qRT PCR | CAGCACAACACTCCCAGGAT          | AATAGTCCCAGTACGCTGC           | AAGGCAGTTACTCCACACCC          | ACCGTACTCTCTGTAACAC           |
| spib1             | SC qRT PCR | CTCACAAACGTCAGCCATCT          | TTGCGATTGCCCTTCTGGAT          | ATCCCAGCAGTCGTAGTCT           | TCTCGATCCACCCACCAGAT          |
| syk               | SC qRT PCR | TGAACGACACCTACGCCATC          | CCGTTGACCCGTGAGGTATT          | AGCTGGAGAACTCATCGCC           | GCAAACGACAGCTCTGAATCC         |
| cd8a              | SC qRT PCR | TGCAAAAAGGACAGACAGCG          | AAAGTCCACAACCTCCGACC          | ACTCTTCTCGGAGAGGTGAC          | ACAGGCTTCAGTGTGTTTGAA         |
| cd8b              | SC qRT PCR | AAGGTGTCTACAACCTGCG           | GCCAAAAGCAGAAGAGCACC          | AGCGAGAAGATGCTGGCTTT          | CGGCTGAAGTGTGGAGGAT           |
| lck               | SC qRT PCR | AGATTGCTGACTTCGGCCTG          | GTAGCCCTCTCGAGGTTTG           | GGCACCAGAGGCCATAAACT          | CTCTGGGTTTGTCTCTCTGG          |
| rag1              | SC qRT PCR | CCAGGTGAAGACATTTGCCG          | ATTACGCAGAGTGTGCAGGG          | AGCAATGATGCAAGGCAGAG          | TGTGCAGGGGCTGGAATATC          |
| rasa4             | SC qRT PCR | GATCCGTGCGGTAGAGAAGG          | AGATGAGCTGAGCCTCCAGA          | TGGAGGAGAAGTGTTCGGC           | TCTGCTTTGTAGATGCCGGG          |
| skap1             | SC qRT PCR | AAAGACCAAGCACTGCCTCA          | CCTCTCTGGAAGGCCAACTC          | GCAGTGAGAGAAGTGGGTCC          | CGGTCCCTCAGCTTCAAACT          |
| efla              | SC qRT PCR | AGCGTGGTATCACCATTGACA         | TTCCTCCAGGGTGAAAGC            | GAGACCAGCAAATACTACGTC         | GGAGATACCAGCCTCAAACCT         |

**Supplementary Table 2: Differentially-regulated genes in Figure 6A.** See Supplementary Table 2

**Supplementary Table 3: Differentially-expressed genes in *hMYC* vs. *mMyc* B-ALL.** See Supplementary Table 3

**Supplementary Table 4: Pathways differing between *hMYC* vs. *mMyc* B-ALL.** See Supplementary Table 4
